# Supplementary material for: Pazopanib and Trametinib as a Synergistic Strategy against Osteosarcoma: Preclinical Activity and Molecular Insights
Source: Cancers (Basel). 2020 Jun 10;12(6):1519. doi: 10.3390/cancers12061519 (PMC7352822; doi:10.3390/cancers12061519)

**Figure 1 B**

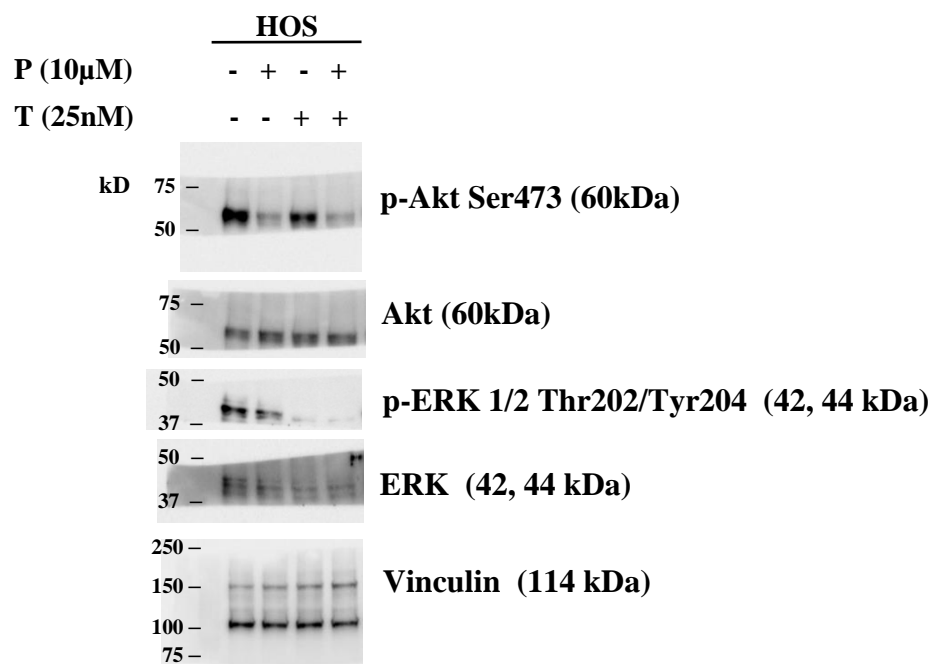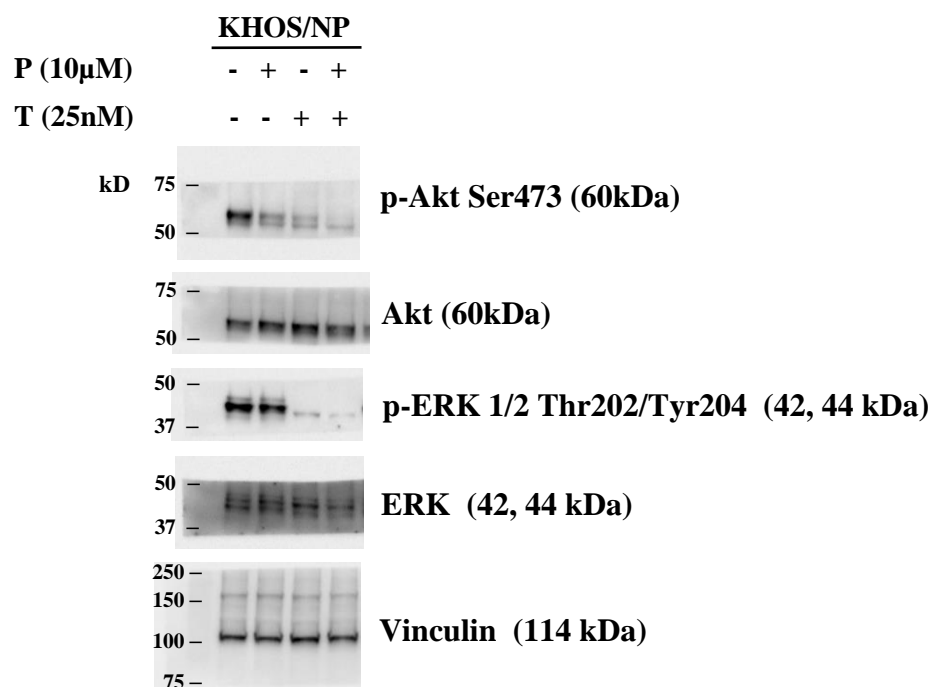

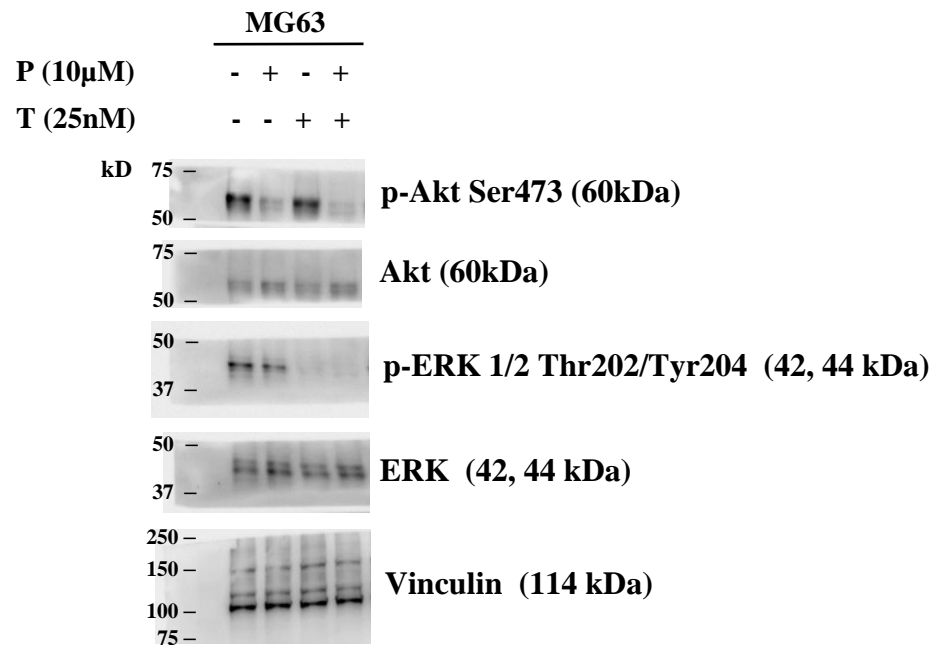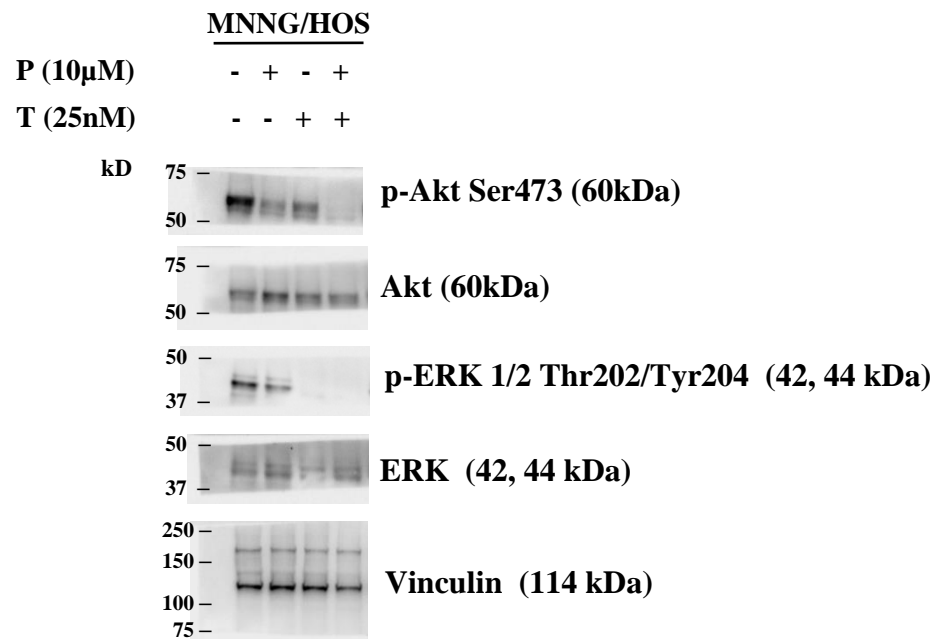

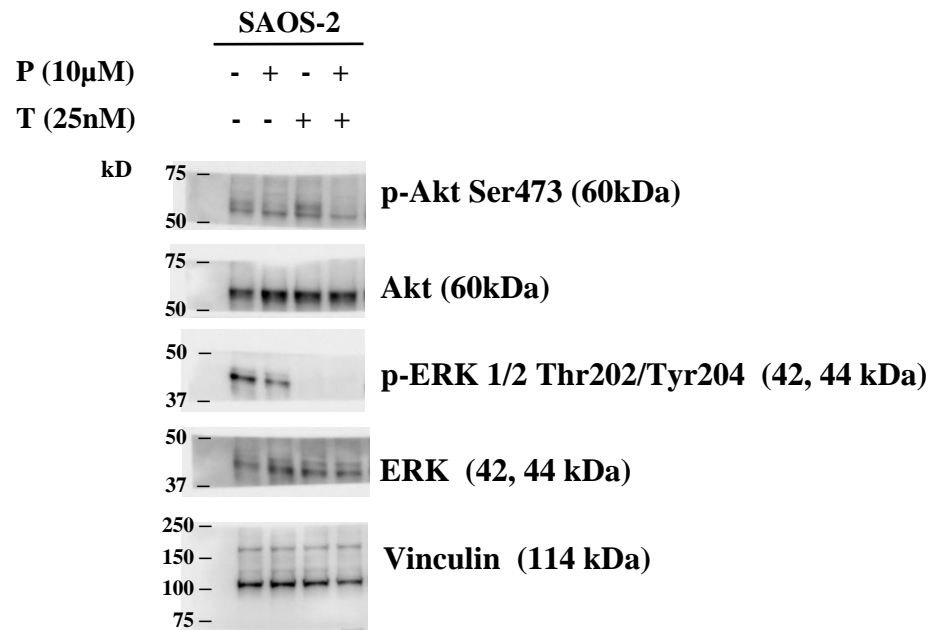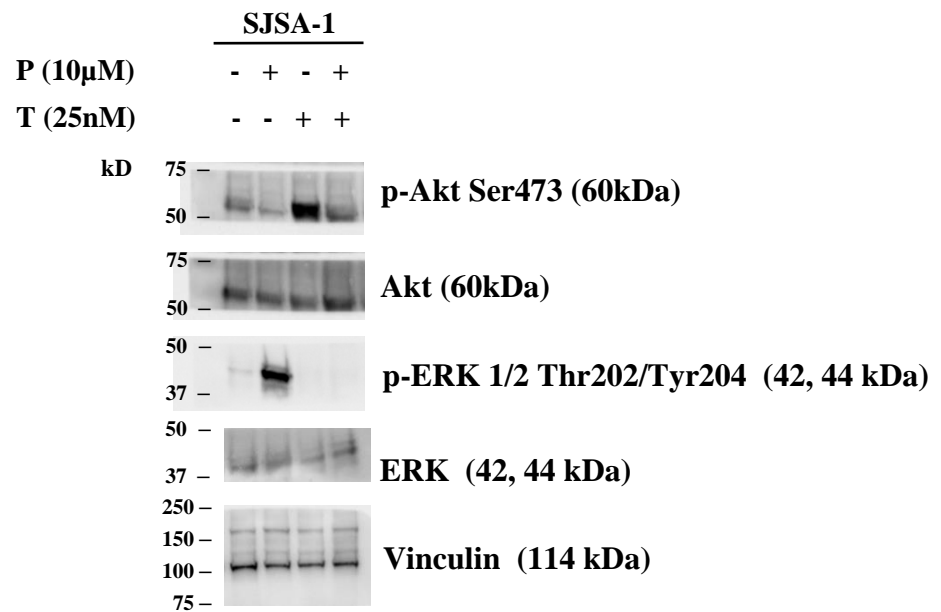

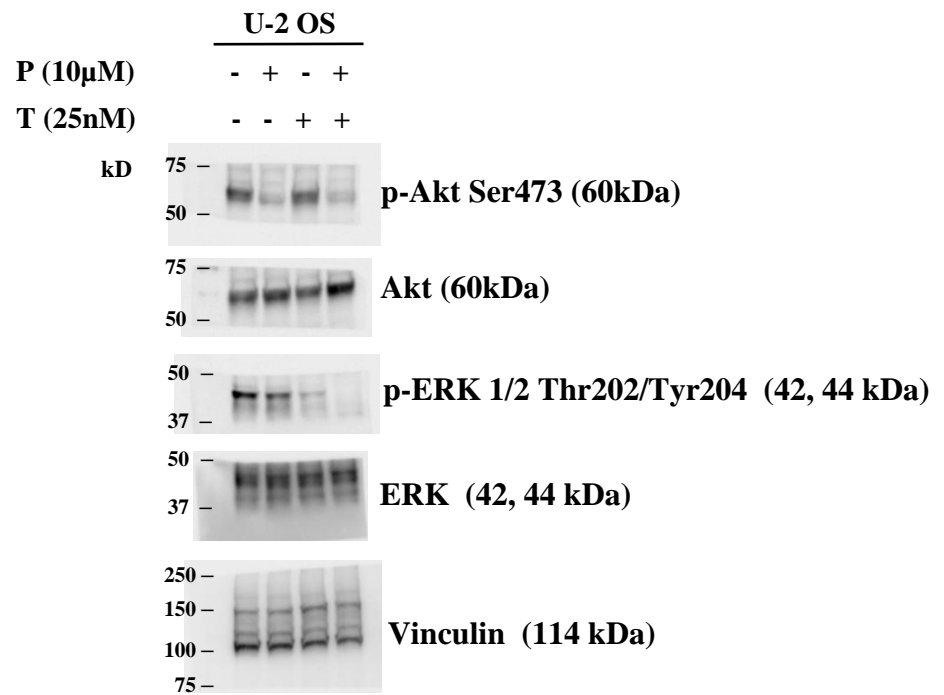

**Figure 3 E**

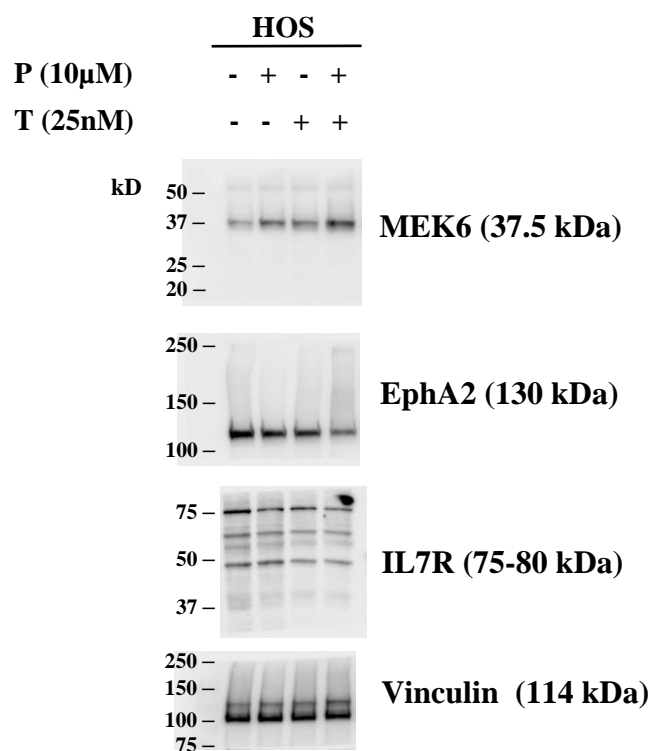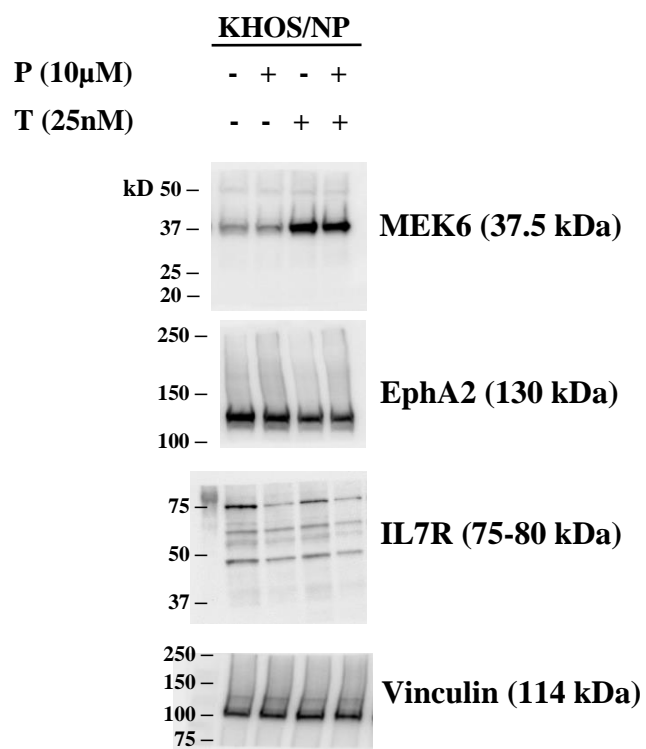

|                 | <u>MG63</u> |   |   |   |
|-----------------|-------------|---|---|---|
| <b>P (10μM)</b> | -           | + | - | + |
| <b>T (25nM)</b> | -           | - | + | + |

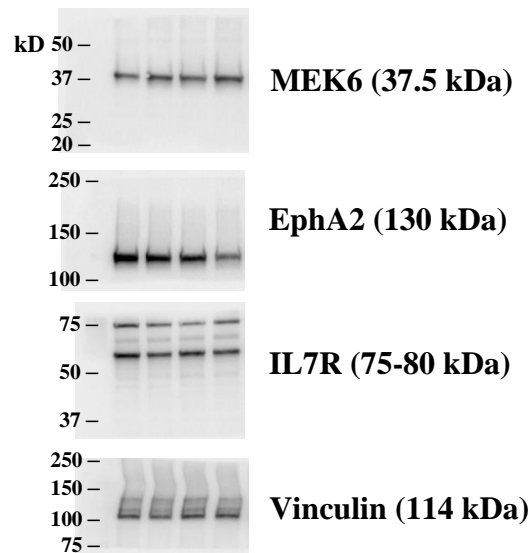

|                 | <u>MNNG/HOS</u> |   |   |   |
|-----------------|-----------------|---|---|---|
| <b>P (10μM)</b> | -               | + | - | + |
| <b>T (25nM)</b> | -               | - | + | + |

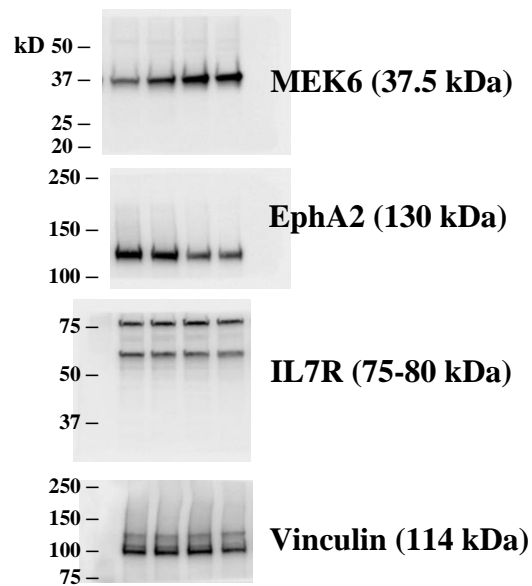

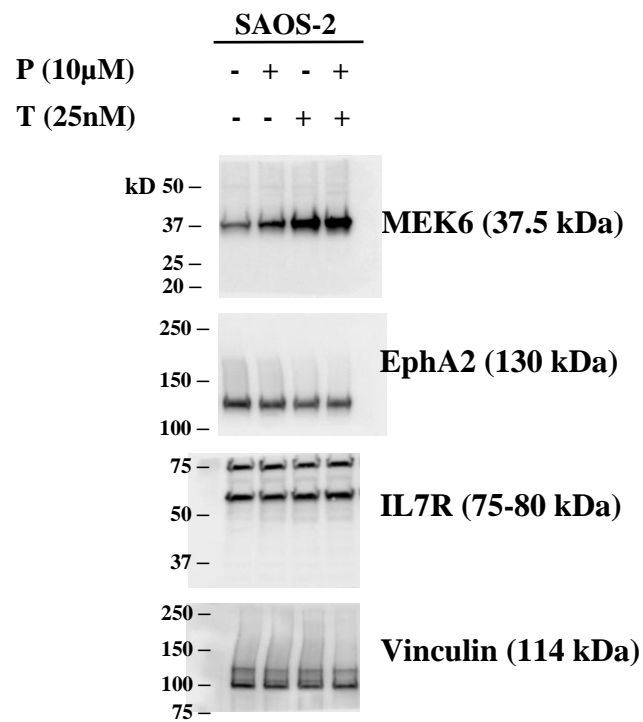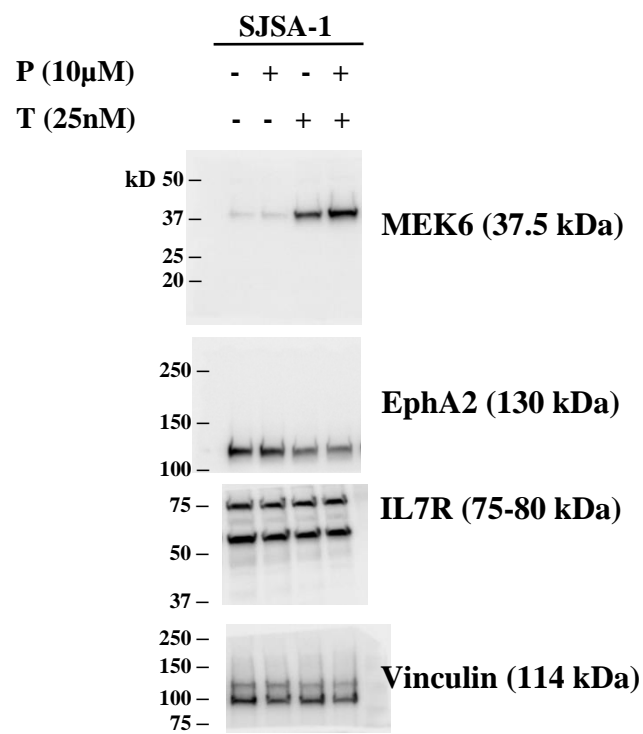

|                 | <u>U-2 OS</u> |   |   |   |
|-----------------|---------------|---|---|---|
| <b>P (10μM)</b> | -             | + | - | + |
| <b>T (25nM)</b> | -             | - | + | + |

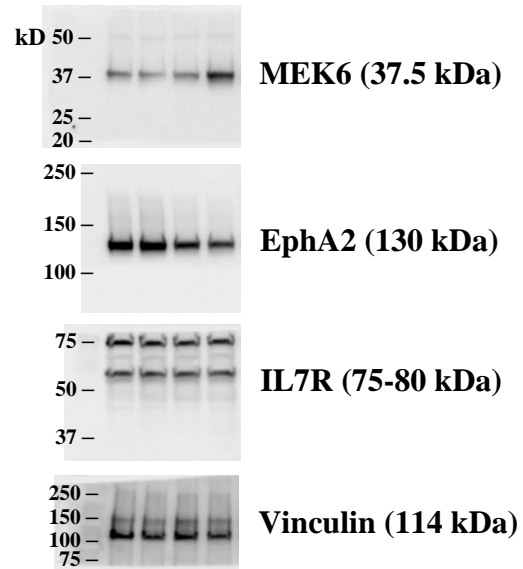

Figure 4 A

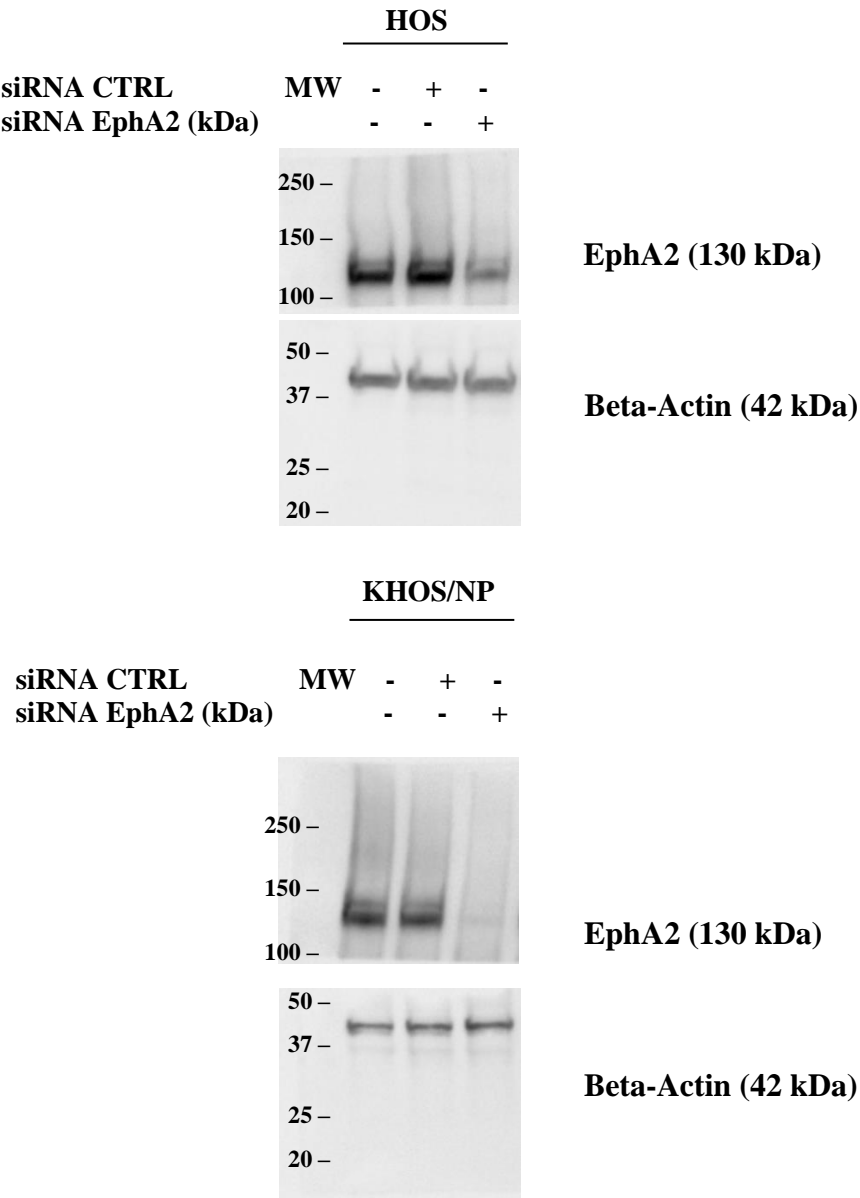

Figure 5 A

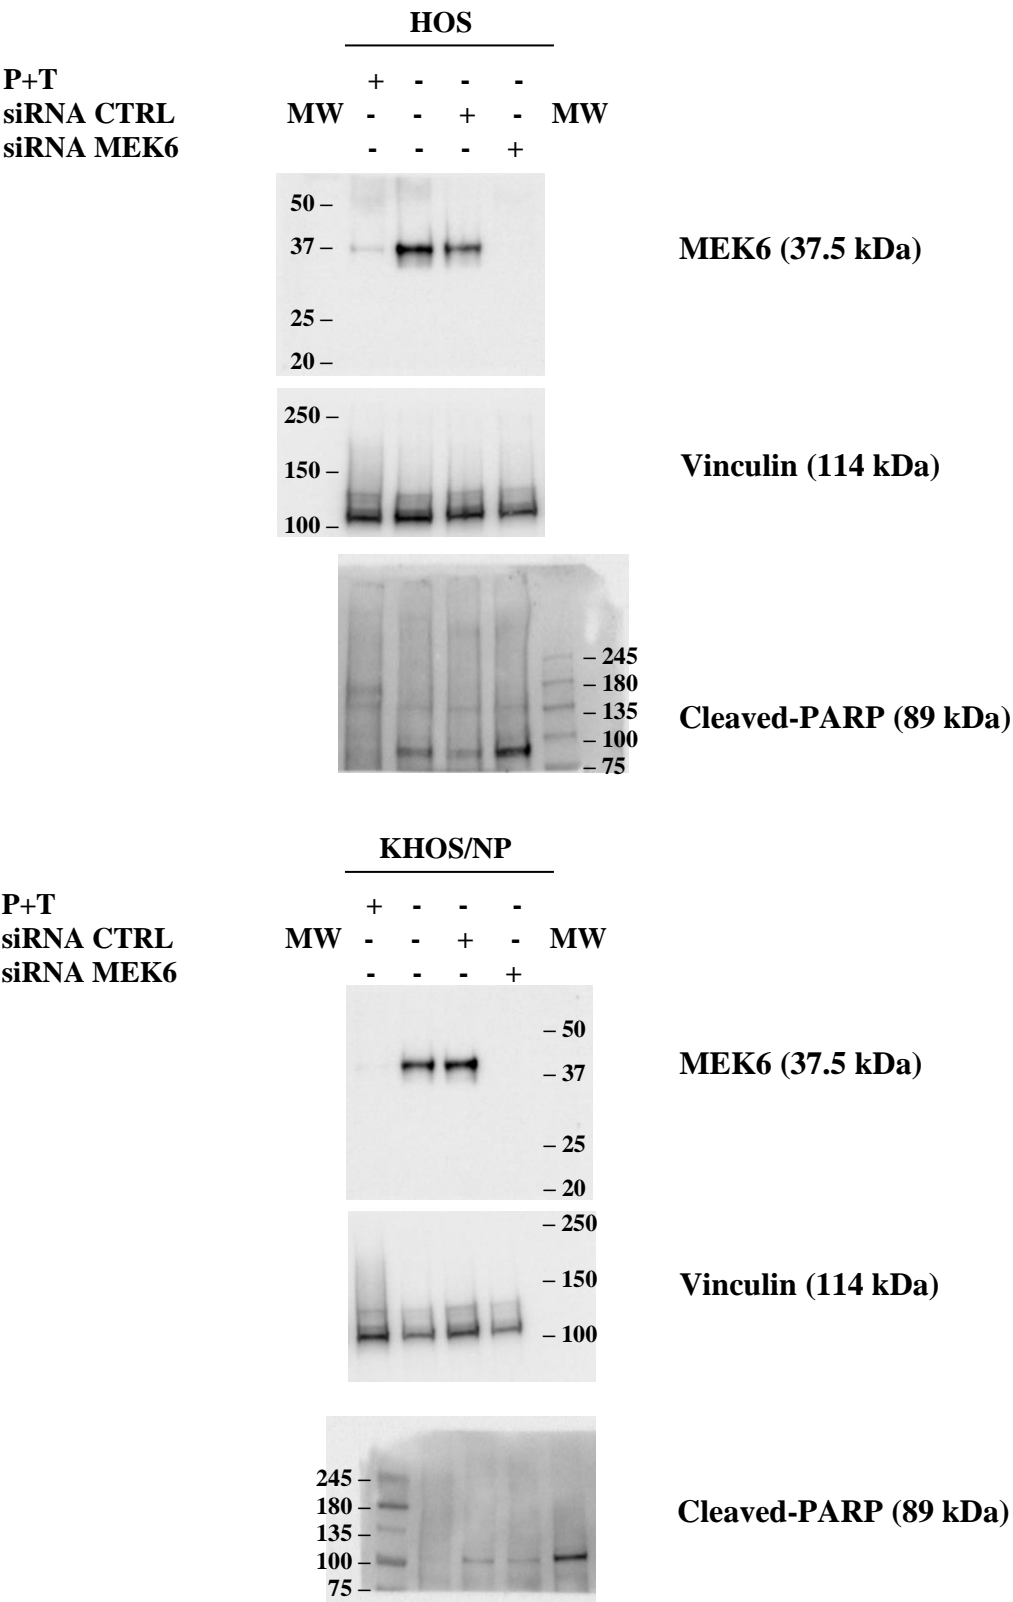

**Figure 5 I**

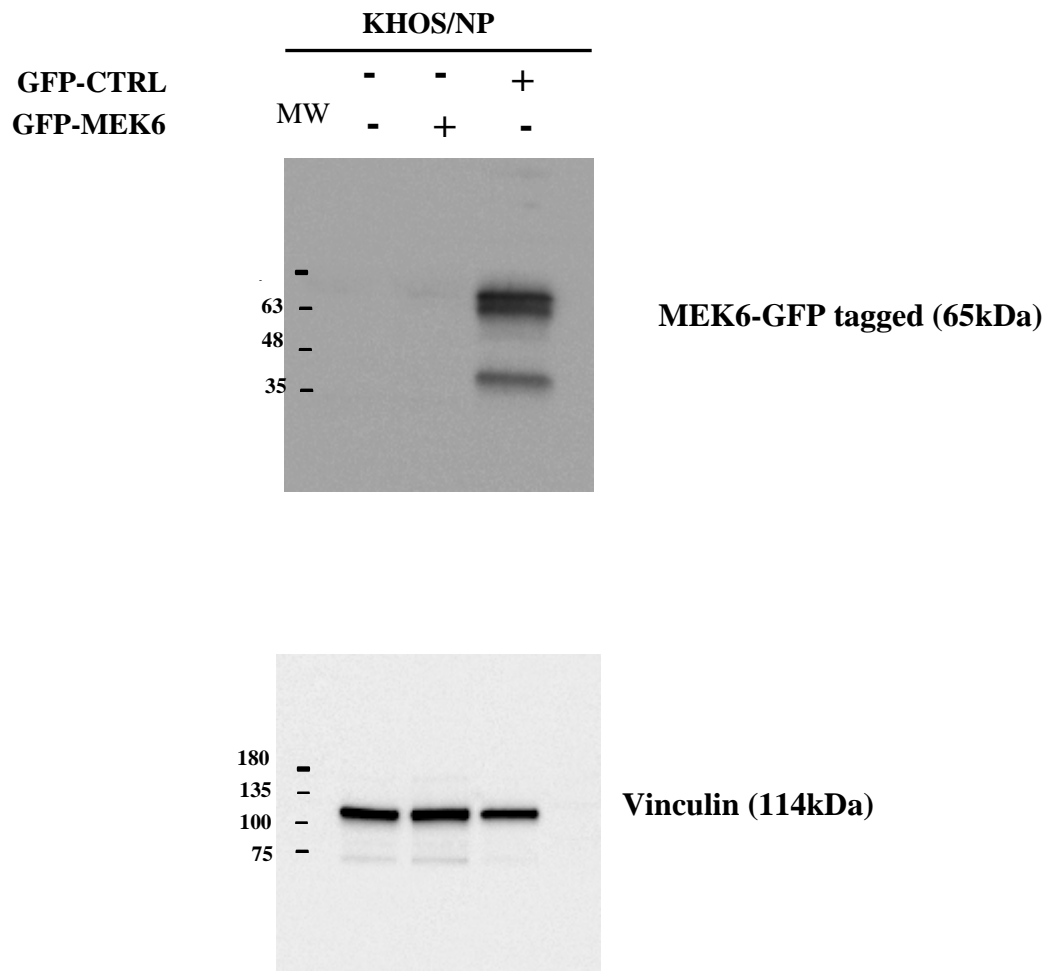

**Figure S2**

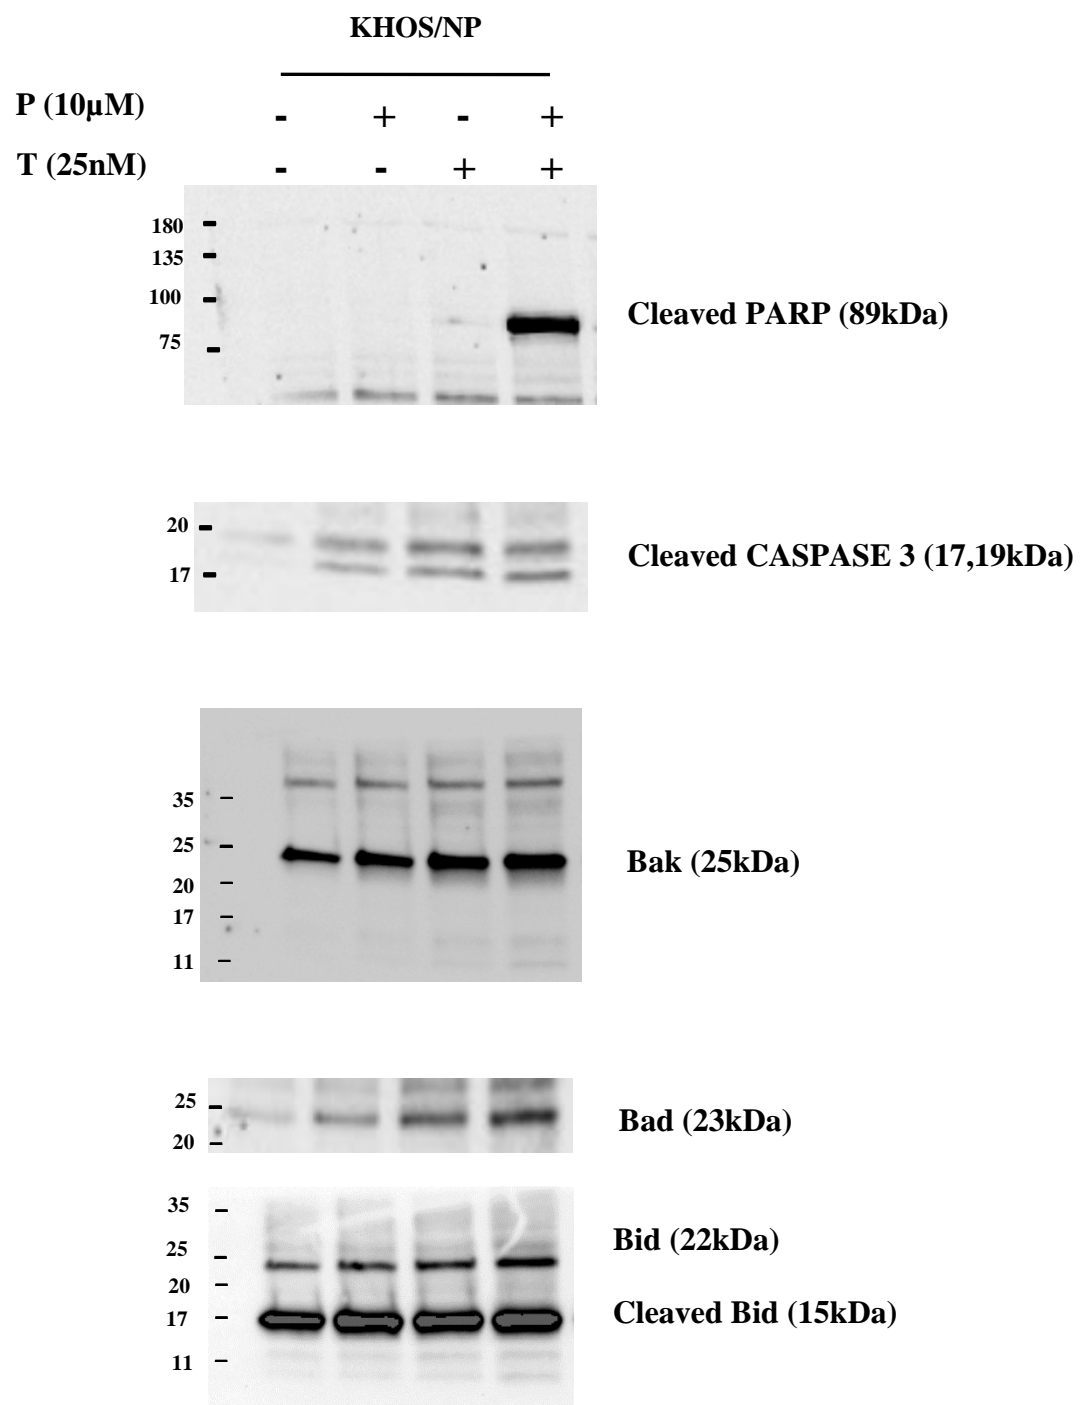

|          | KHOS/NP |   |   |   |
|----------|---------|---|---|---|
| P (10μM) | -       | + | - | + |
| T (25nM) | -       | - | + | + |

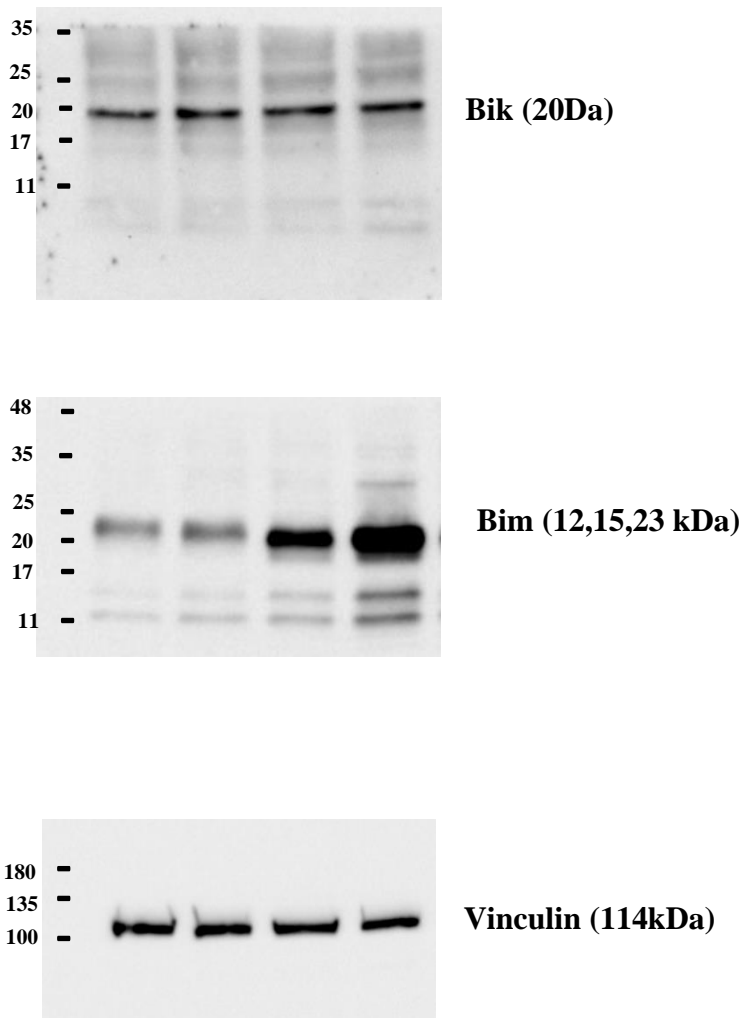

**Figure S3**

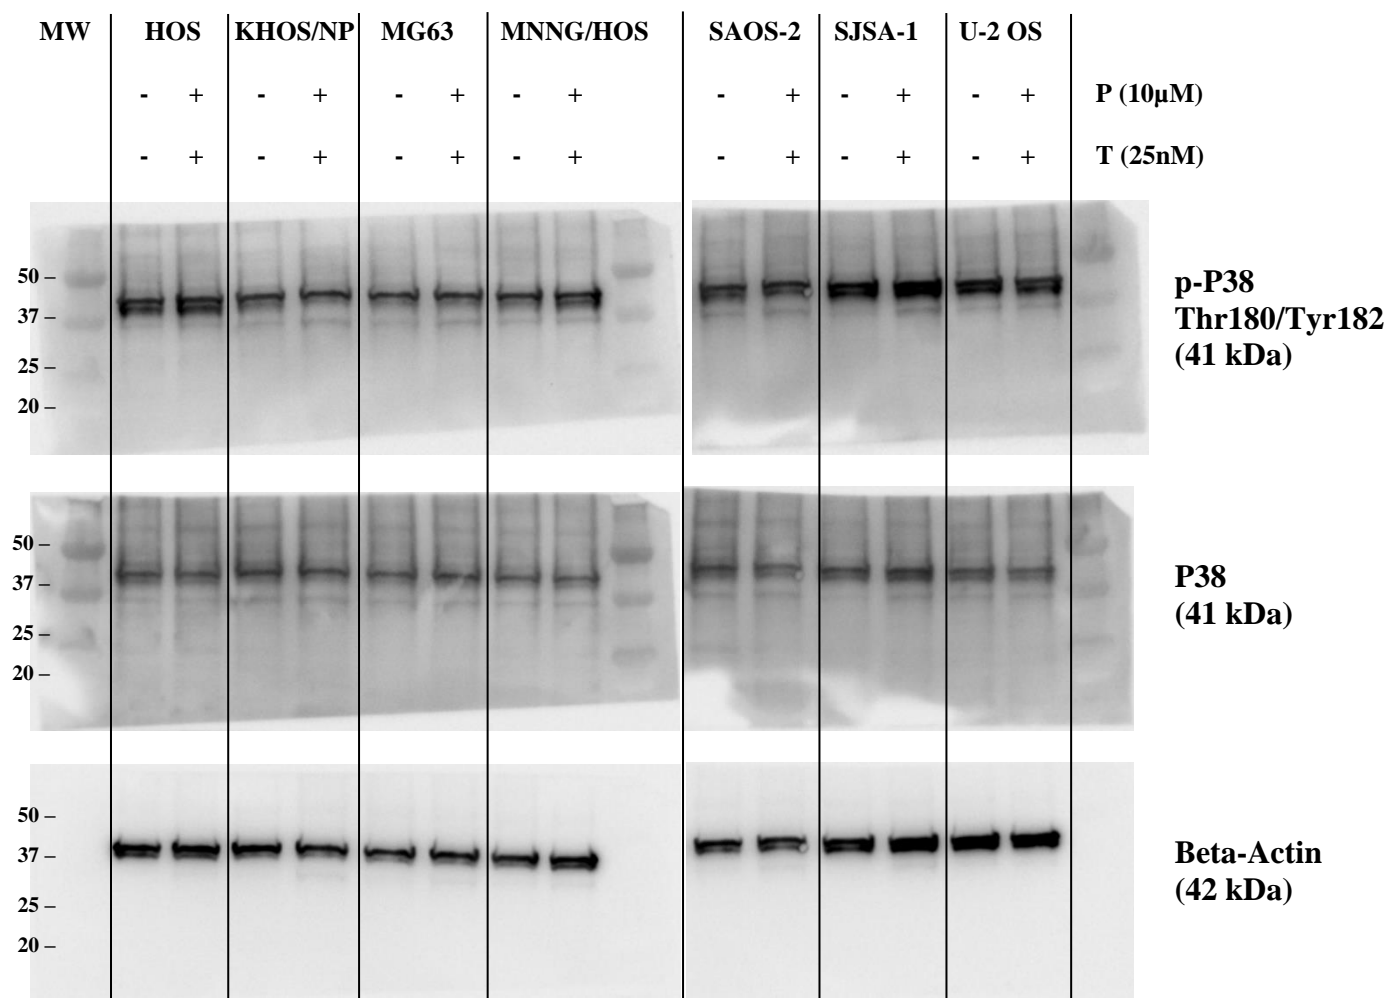

Supplement: Supplementary file 1 [file cancers-12-01519-s001.zip › cancers-823818-Western blot images.pdf]
