# Supplementary material for: Pazopanib and Trametinib as a Synergistic Strategy against Osteosarcoma: Preclinical Activity and Molecular Insights
Source: MDPI journal article supplement (doi:10.3390/cancers12061519), 2020-06-10
Supplement: s1 [file s1]

## Supplementary Materials: Pazopanib and Trametinib as a Synergistic Strategy against Osteosarcoma: Preclinical Activity and Molecular Insights

**Table S1.** Summary of receptor tyrosine kinase (RTK) expression level (sum of fluorescence intensity of each tested RTK), P-AKT and P-ERK band intensity, IC<sub>50</sub> of pazopanib (P), trametinib (T) as single agents and in combination (above); and their relative Pearson's correlation (below).

| Cell Line | RTK Expression Level | P-AKT | P-ERK | IC <sub>50</sub> P (μM) | IC <sub>50</sub> T (nM) | IC <sub>50</sub> P combination (μM) | IC <sub>50</sub> T combination (nM) |
|-----------|----------------------|-------|-------|-------------------------|-------------------------|-------------------------------------|-------------------------------------|
| HOS       | 260                  | 2.23  | 1.82  | 14.26                   | >50.00                  | 8.99                                | 22.00                               |
| KHOS/NP   | 192                  | 1.42  | 2.65  | 16.98                   | 4.00                    | 0.88                                | 2.00                                |
| MG63      | 237                  | 1.21  | 0.82  | 9.84                    | 45.00                   | 3.36                                | 8.00                                |
| MNNG-HOS  | 205                  | 1.89  | 1.73  | 10.84                   | 25.00                   | 3.23                                | 8.00                                |
| SAOS-2    | 165                  | 0.62  | 1.24  | >20.00                  | 24.00                   | 2.77                                | 7.00                                |
| SJSA-1    | 337                  | 0.41  | 1.34  | 6.00                    | 18.00                   | 4.53                                | 11.00                               |
| U-2OS     | 240                  | 1.32  | 0.56  | 10.32                   | >50.00                  | 4.57                                | 11.00                               |

  

| Pearson Correlation |        | P-AKT vs IC <sub>50</sub> | P-ERK vs IC <sub>50</sub> |
|---------------------|--------|---------------------------|---------------------------|
| P                   | - 0.82 | 0.11                      | 0.42                      |
| T                   | 0.18   | 0.38                      | -0.67                     |
| P+T                 | 0.49   | 0.44                      | -0.19                     |

**Table S2.** Summary of crucial gene alterations, induction of MEK6 upon drug treatment and correlation with cellular outcomes (induction of apoptosis and potential molecular mechanism evoked) in each cell lines.

| Cell Line | KRAS                                        | Induction of Apoptosis | Induction of MEK6 | Potential Molecular Outcome upon Treatment                              | TP53 STATUS                                                | CDKN2A/RB Pathway                            | References                         |
|-----------|---------------------------------------------|------------------------|-------------------|-------------------------------------------------------------------------|------------------------------------------------------------|----------------------------------------------|------------------------------------|
| HOS       |                                             | <50%                   | low               | oncogenic mutant p53 might be active                                    | c.467G>C p.R156P (COSS907060) gain-of function : oncogenic | Homozygous for CDKN2A deletion c.1_471del471 | DOI: 10.1002/GCC.20717             |
| KHOS/NP   | overexpressed murine Kirstein sarcoma virus | >50%                   | high              | oncogenic mutant p53 is turn off by MEK6 upregulation                   | c.467G>C p.R156P (COSS907060) gain-of function: oncogenic  | Homozygous for CDKN2A deletion c.1_471del471 | DOI: 10.18632/oncotarget.6634      |
| MG63      |                                             | <50%                   | low               | p53 loss                                                                | loss of p53                                                | Homozygous for CDKN2A deletion c.1_471del471 | DOI: 10.1128/mcb.10.11.5772        |
| MNNG-HOS  |                                             | >50%                   | high              | oncogenic mutant p53 is turn off by MEK6 upregulation                   | c.467G>C p.R156P (COSS907060) gain-of function: oncogenic  | Homozygous for CDKN2A deletion c.1_471del471 | DOI: 10.1002/GCC.20717             |
| SAOS-2    |                                             | >50%                   | high              | rb1 loss activate E2F1 (tansduction of apoptotic mitochondrial protein) | c.1_1182del1182 loss- of- function                         | loss of RB1 (c.2212_2787del576)              | DOI: 10.1128/mcb.10.11.5772        |
| SJSA-1    | c.183A>T P. Q61H (COSV55498802)             | <50%                   | high              | MDM2 amplification ihibited wild type p53                               | WT (COSMIC 909717) MDM2 amplification                      | Hemyzygous deletion of CDKN2A                | DOI: 10.1126/science.1092472       |
| U-2OS     |                                             | >50%                   | intermediate/low  | wild type p53 contributed to apoptosis induction                        | WT                                                         | loss of CDKN2A                               | DOI: 10.1158/1541-7786.MCR-17-0089 |

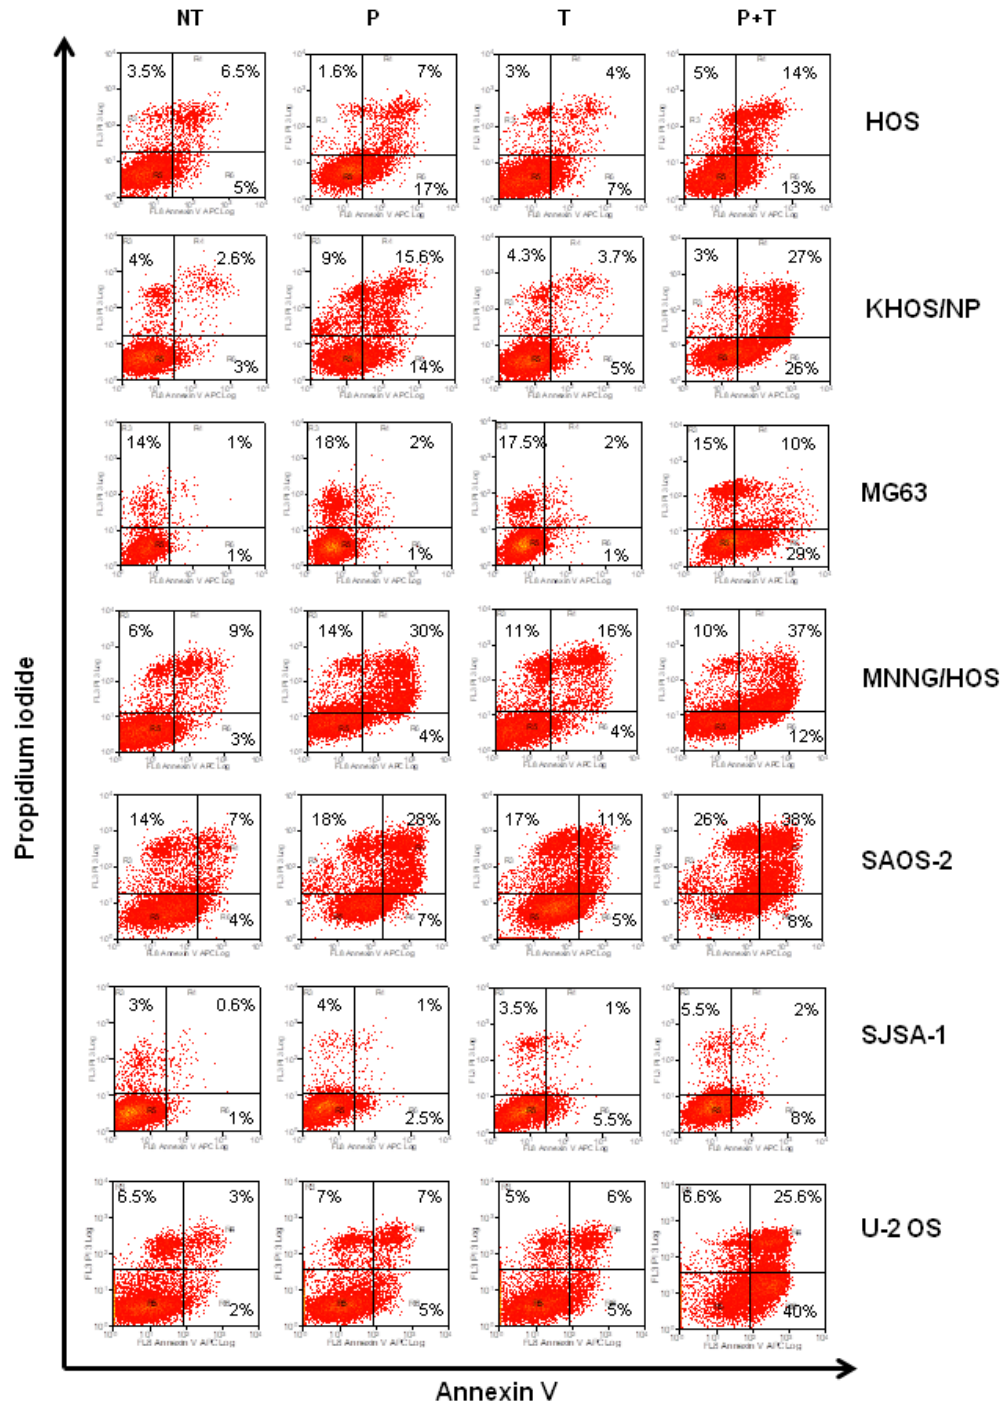

**Figure S1.** The combination of pazopanib and trametinib induced apoptosis in osteosarcoma cell lines. Representative dot plots of cell distribution in early and late phases of apoptosis after 72 hours of treatment with pazopanib (10 $\mu$ M) and trametinib (25nM) as single agents and in combination. NT = not treated. P = pazopanib. T = trametinib. P+T = pazopanib+trametinib combination.

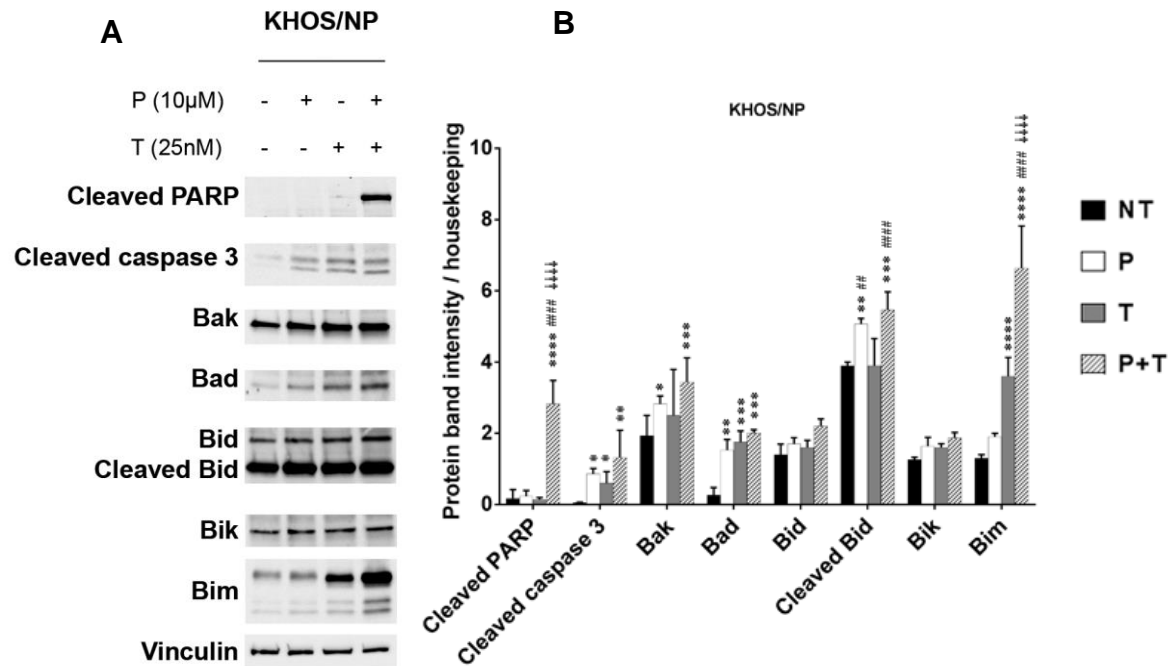

**Figure S2.** Pazopanib + trametinib combination induced apoptosis in osteosarcoma cells by modulating the expression and activation of Bcl-2 family pro-apoptotic members and the cleavage of caspase 3 and PARP. **(A)** Representative western blot analysis of protein expression/activation/cleavage after 24 hour-exposure to pazopanib (10 μM) and trametinib (25 nM) as single agents and in combination. **(B)** Densitometric analysis of protein expression normalized to housekeeping bands. Data are expressed as mean ± SD. Independent experiments were performed three times in KHOS cells. \*  $p < 0.05$ , \*\*  $p < 0.01$ , \*\*\*  $p < 0.001$ , \*\*\*\*  $p < 0.0001$  vs. controls; ##  $p < 0.01$ , ###  $p < 0.001$  vs. trametinib; +++  $p < 0.0001$  vs. pazopanib. NT = not treated, P = pazopanib, T = trametinib, P+T = pazopanib+trametinib combination.

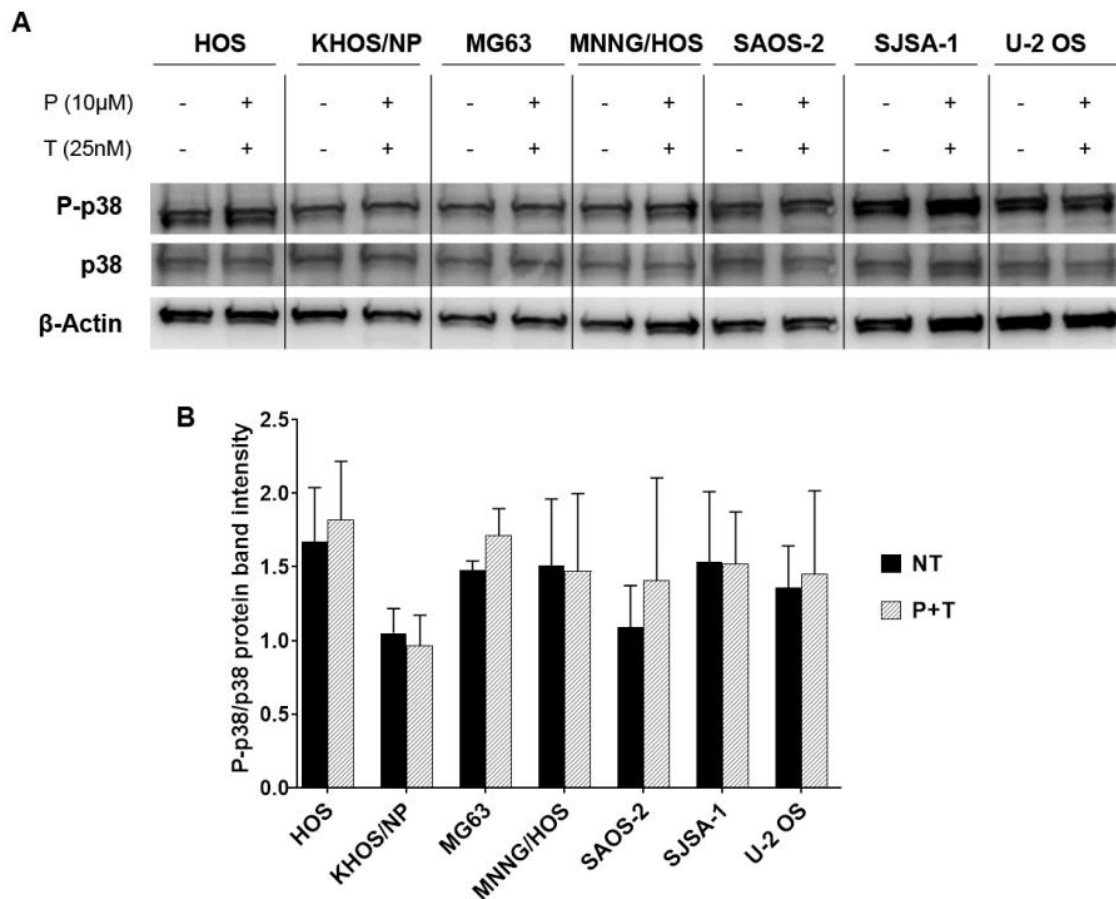

**Figure S3.** Pazopanib+trametinib combination did not significantly change p38 activation. **(A)** Representative western blot images. **(B)** Densitometric analysis of protein band intensity normalized to housekeeping bands. Data are expressed as mean  $\pm$  SD of two independent experiments.

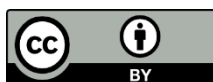

© 2020 by the authors. Licensee MDPI, Basel, Switzerland. This article is an open access article distributed under the terms and conditions of the Creative Commons Attribution (CC BY) license (<http://creativecommons.org/licenses/by/4.0/>).
