# Supplementary figures and images for: Pazopanib and Trametinib as a Synergistic Strategy against Osteosarcoma: Preclinical Activity and Molecular Insights
Source: MDPI journal article supplement (doi:10.3390/cancers12061519), 2020-06-10

**Figure 1 B**

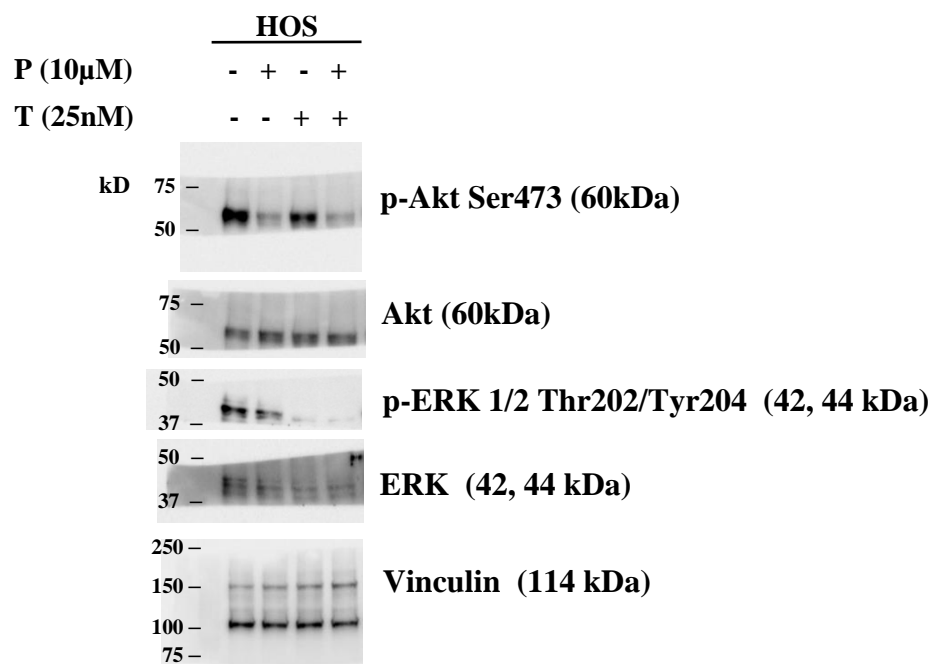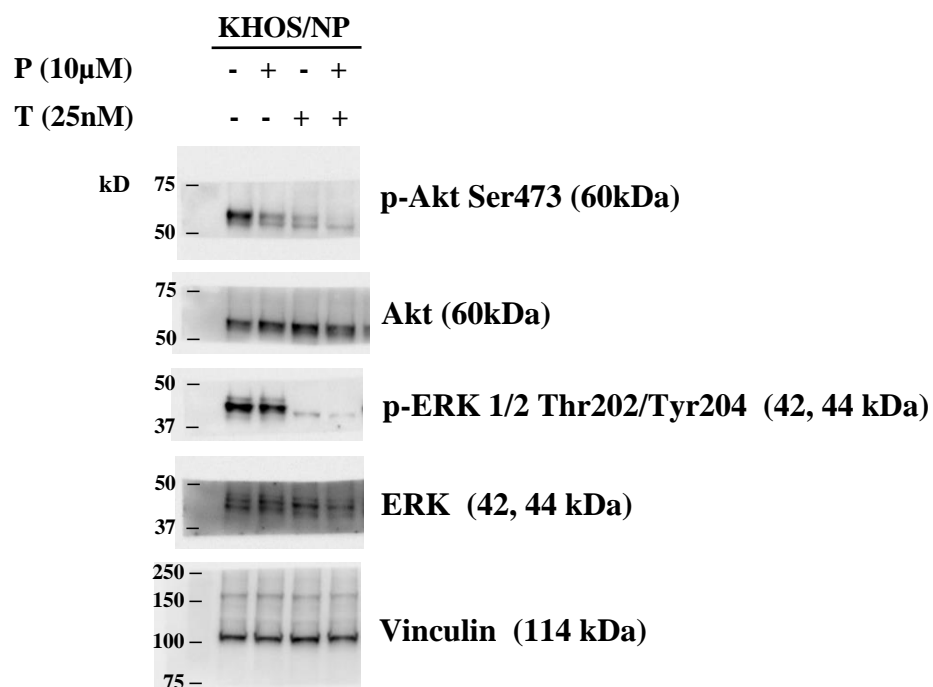

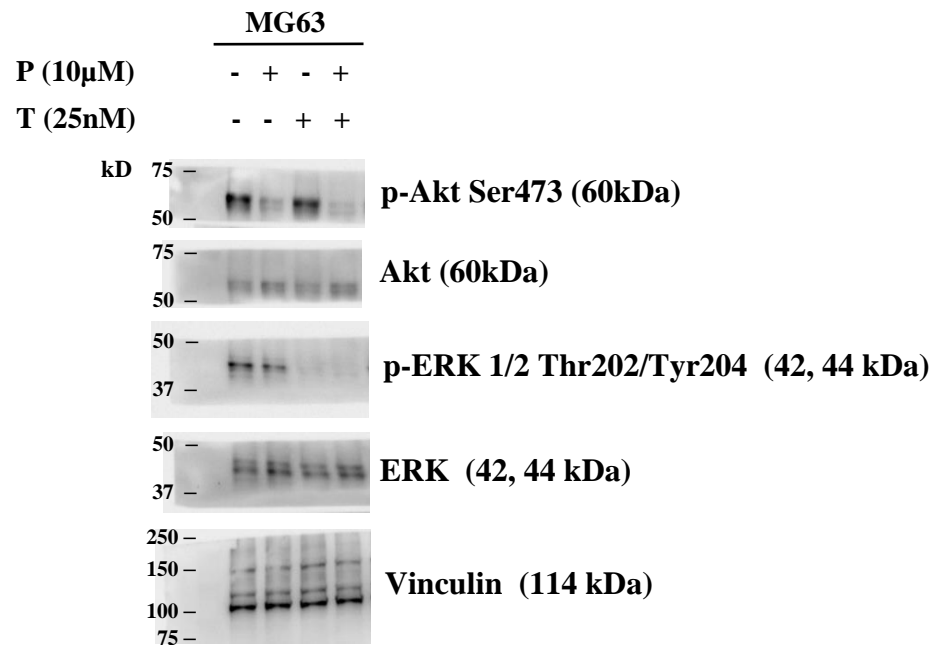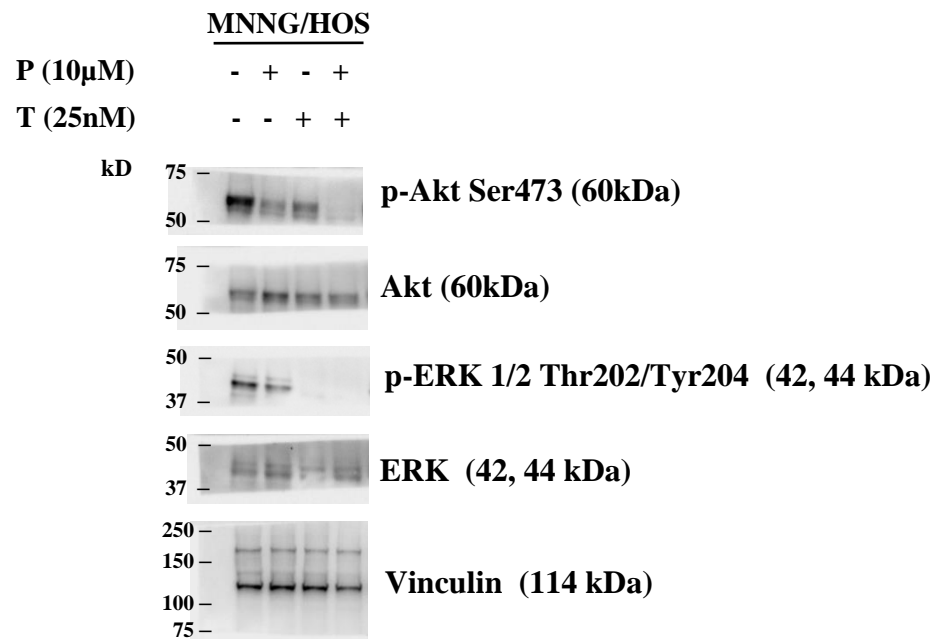

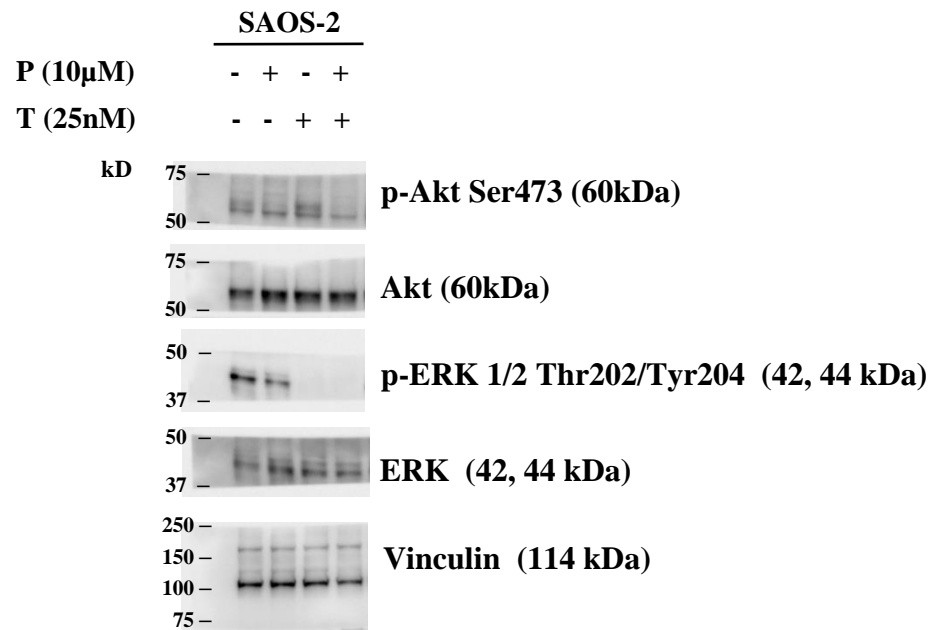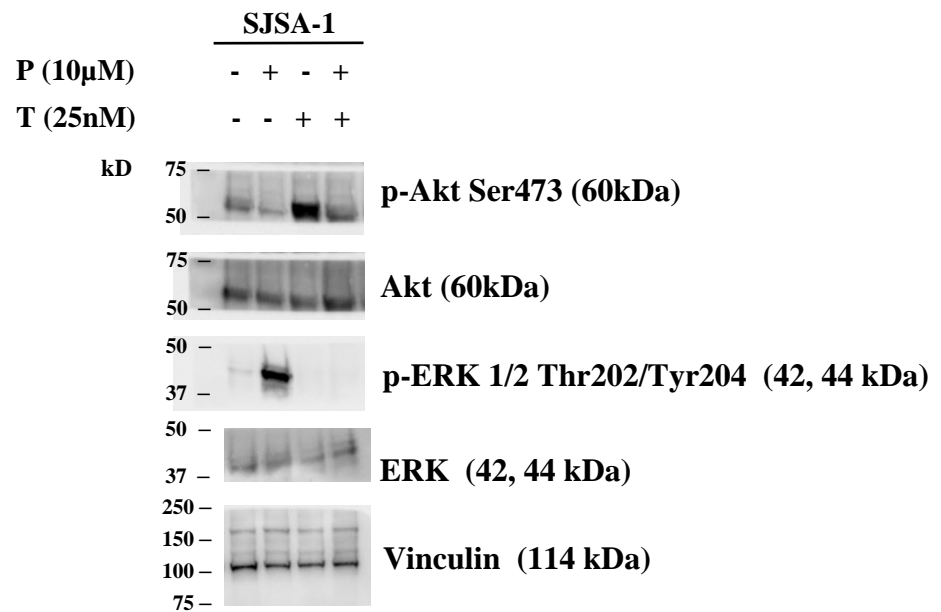

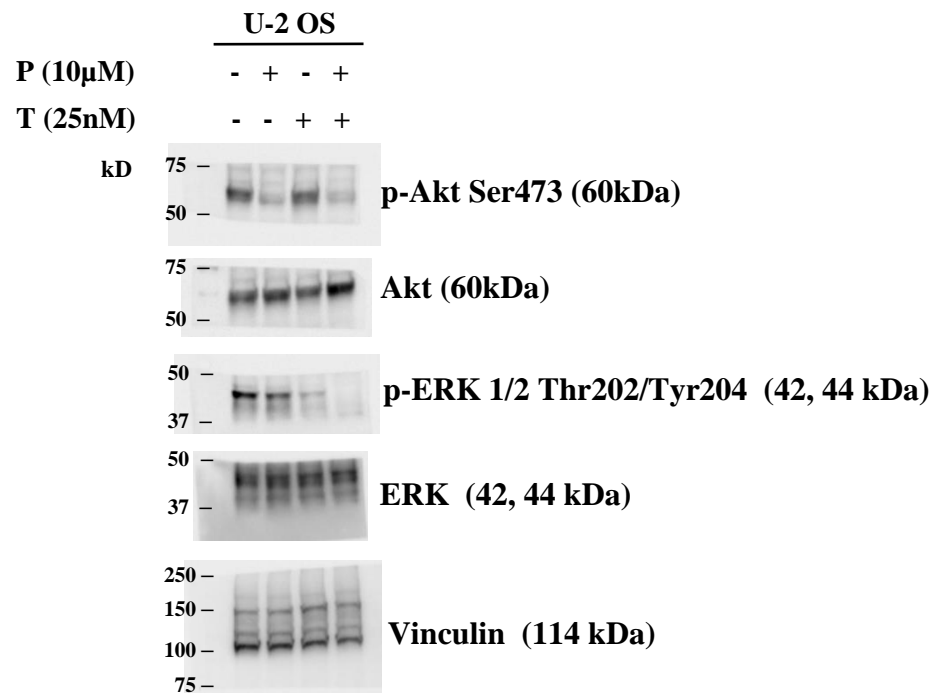

**Figure 3 E**

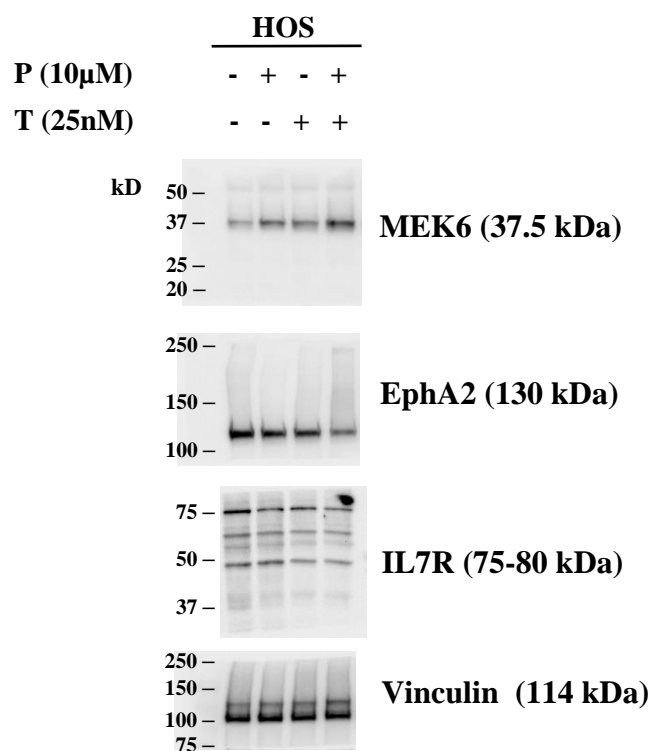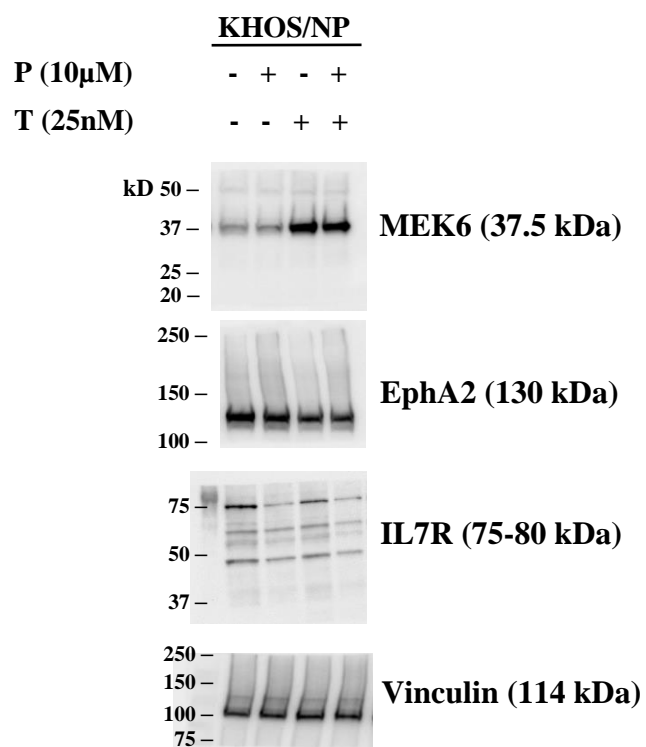

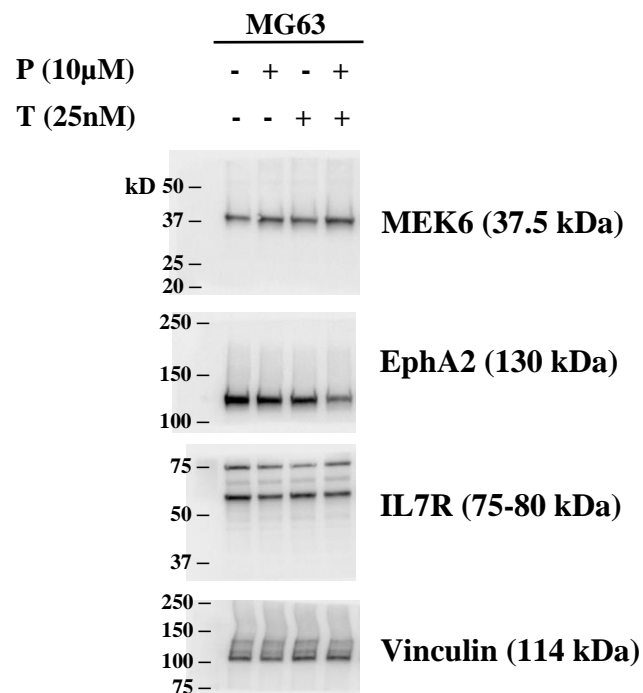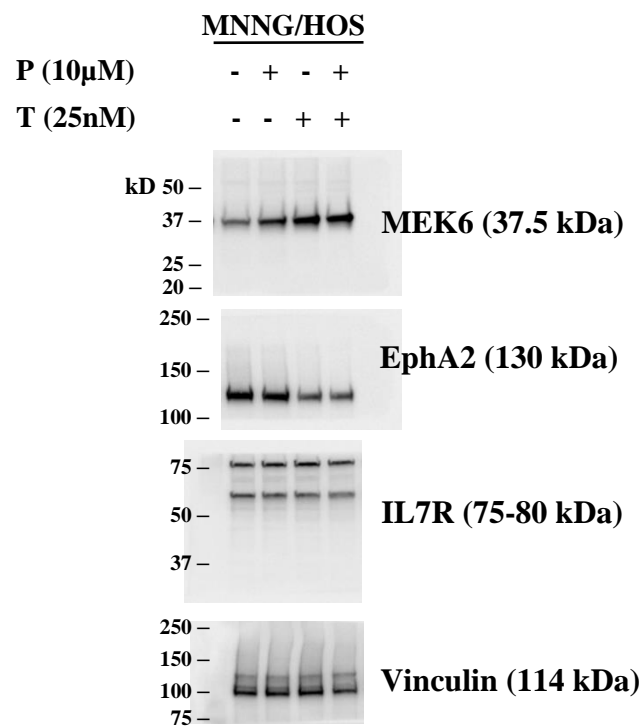

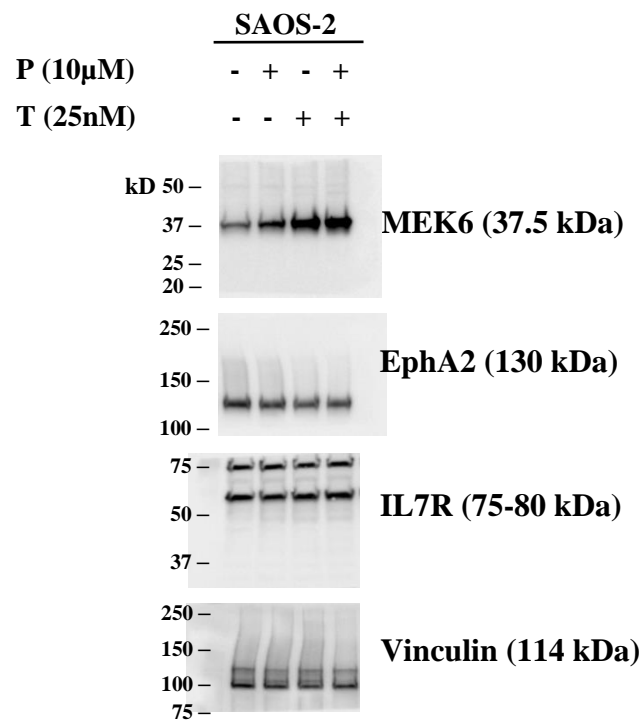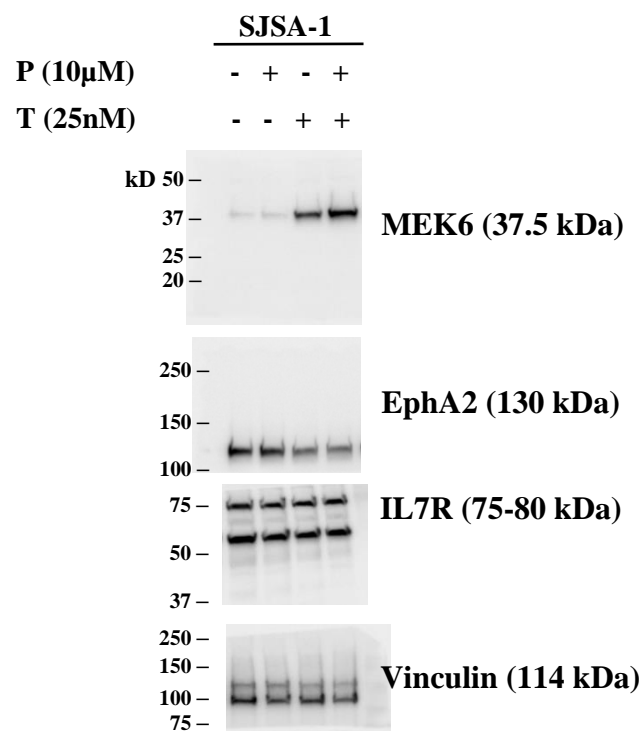

|                 | <u>U-2 OS</u> |   |   |   |
|-----------------|---------------|---|---|---|
| <b>P (10μM)</b> | -             | + | - | + |
| <b>T (25nM)</b> | -             | - | + | + |

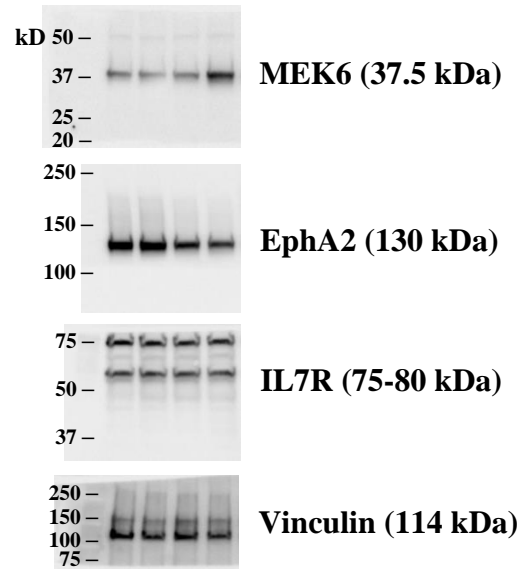



Figure 4 A

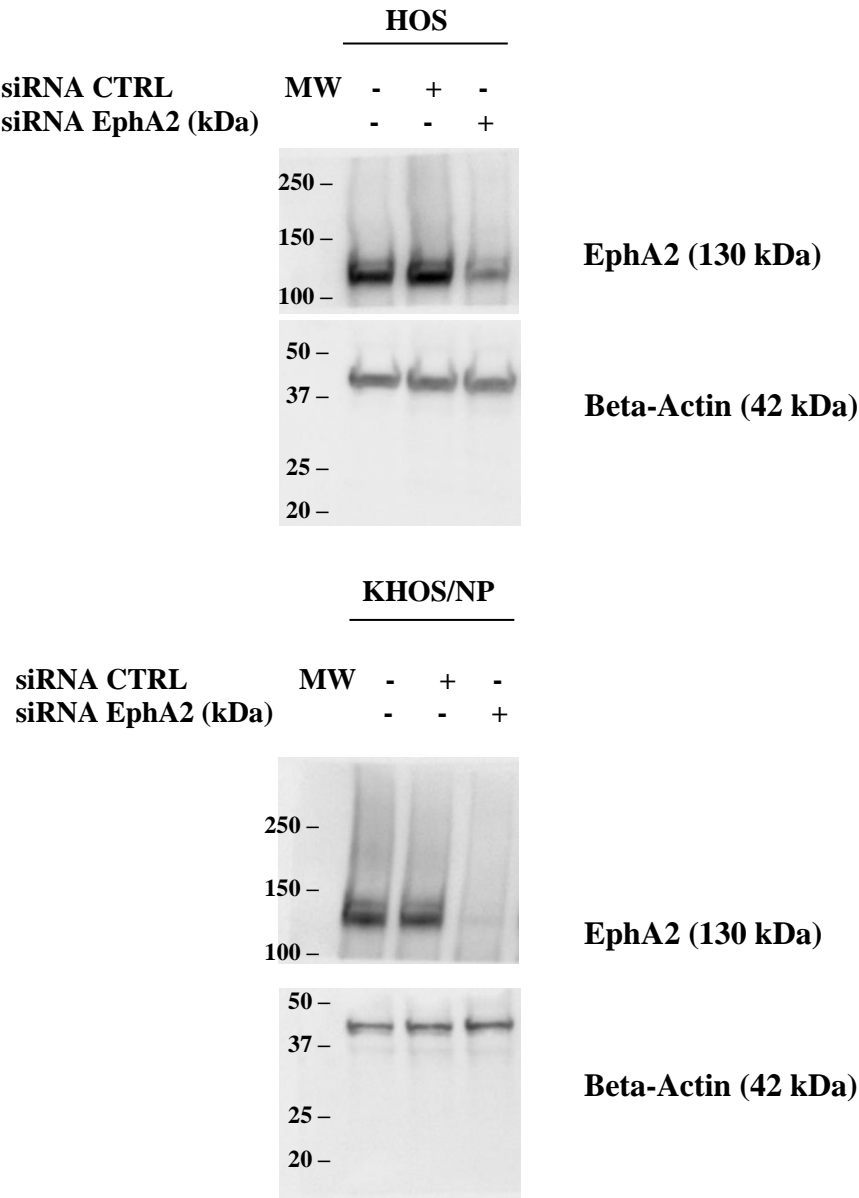

Figure 5 A

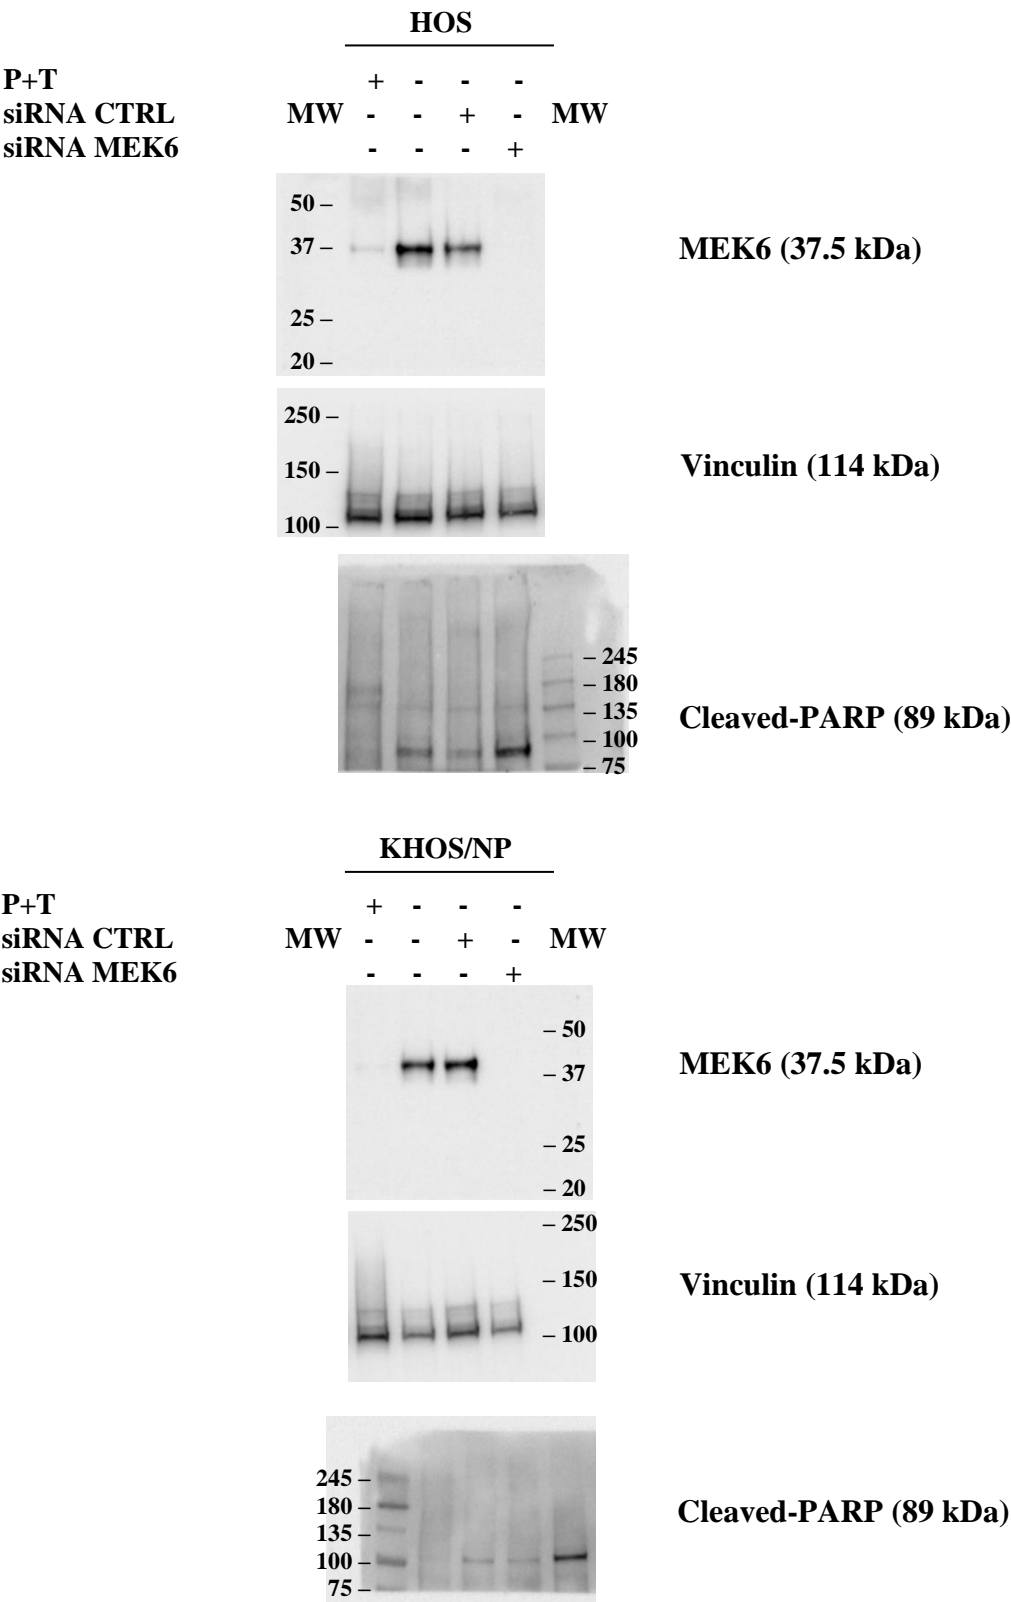

**Figure 5 I**

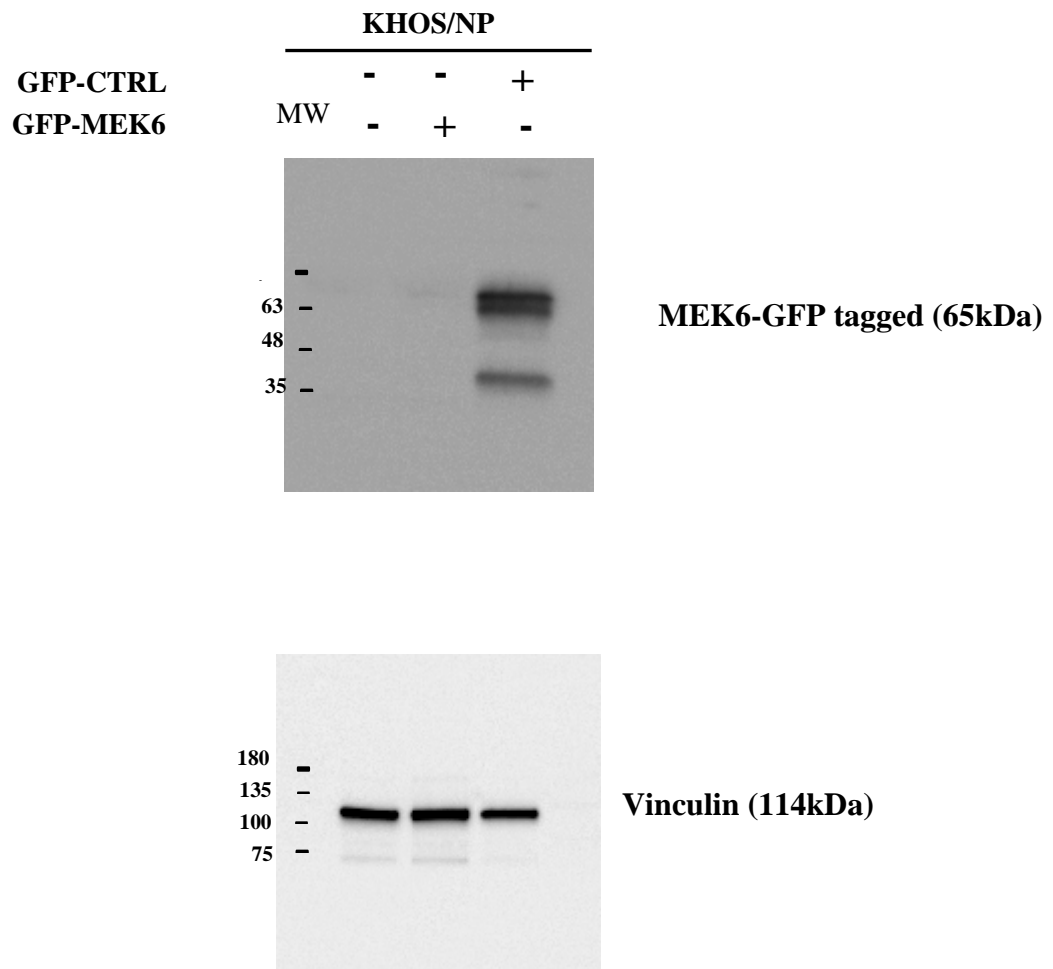

**Figure S2**

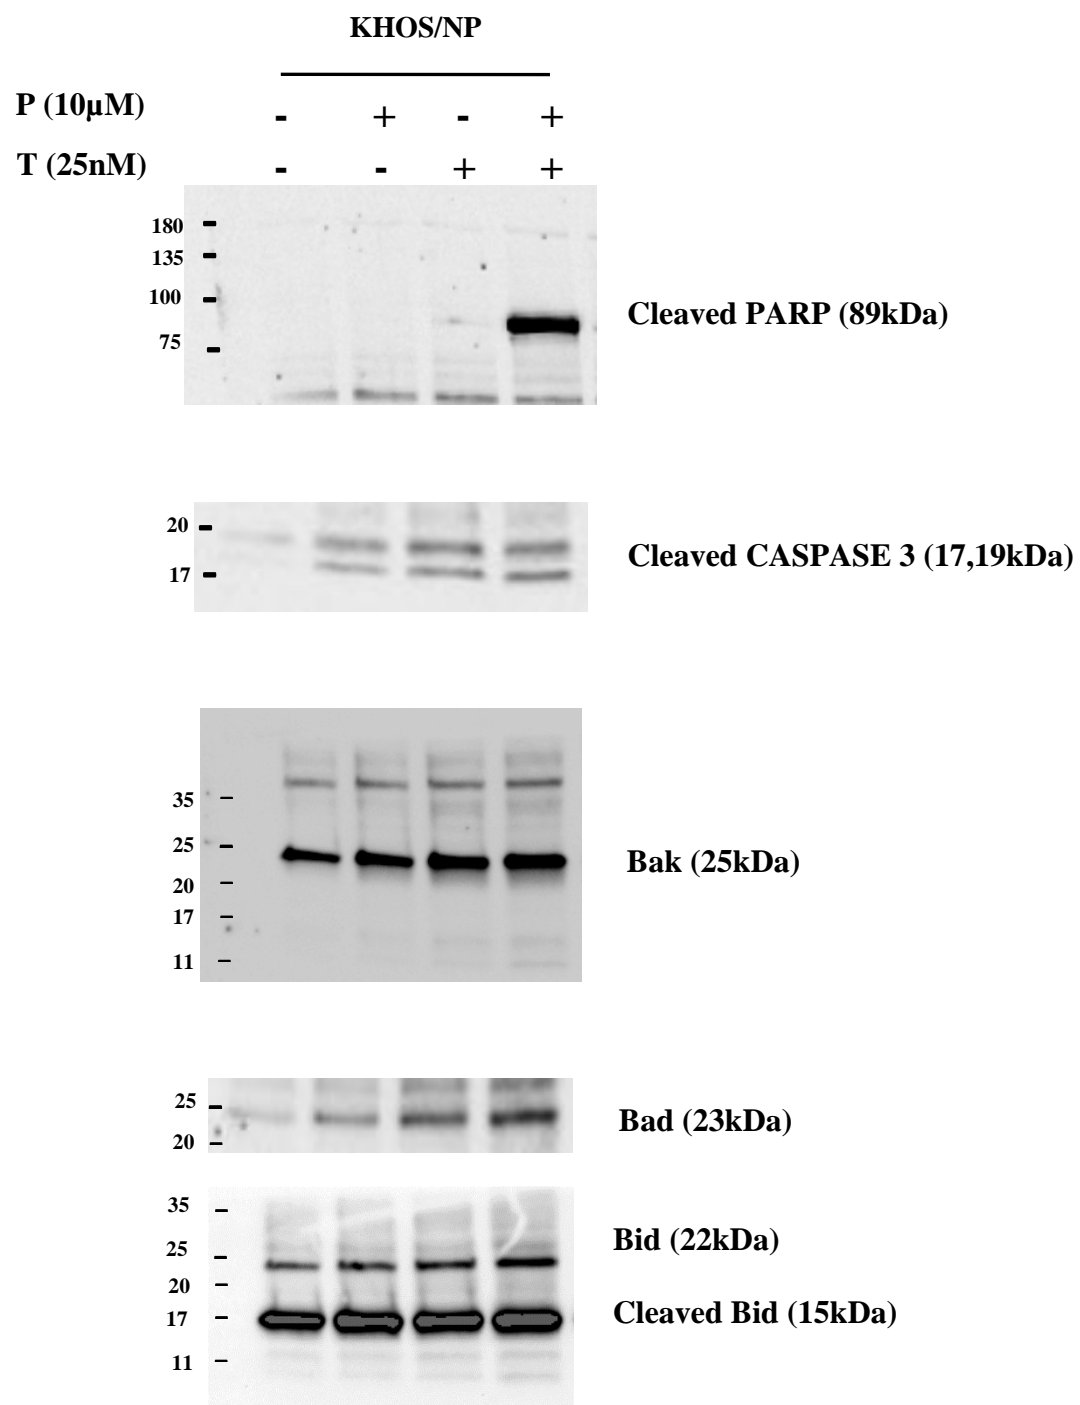

|          | KHOS/NP |   |   |   |
|----------|---------|---|---|---|
| P (10μM) | -       | + | - | + |
| T (25nM) | -       | - | + | + |

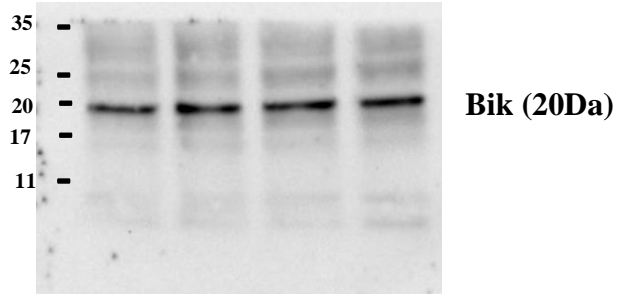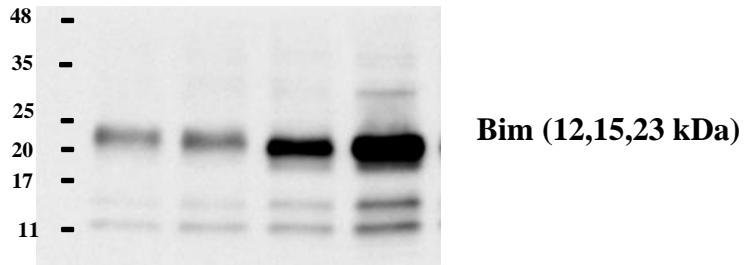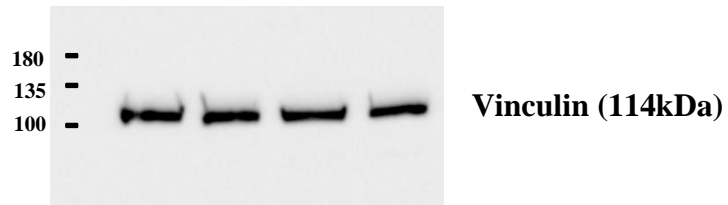

**Figure S3**

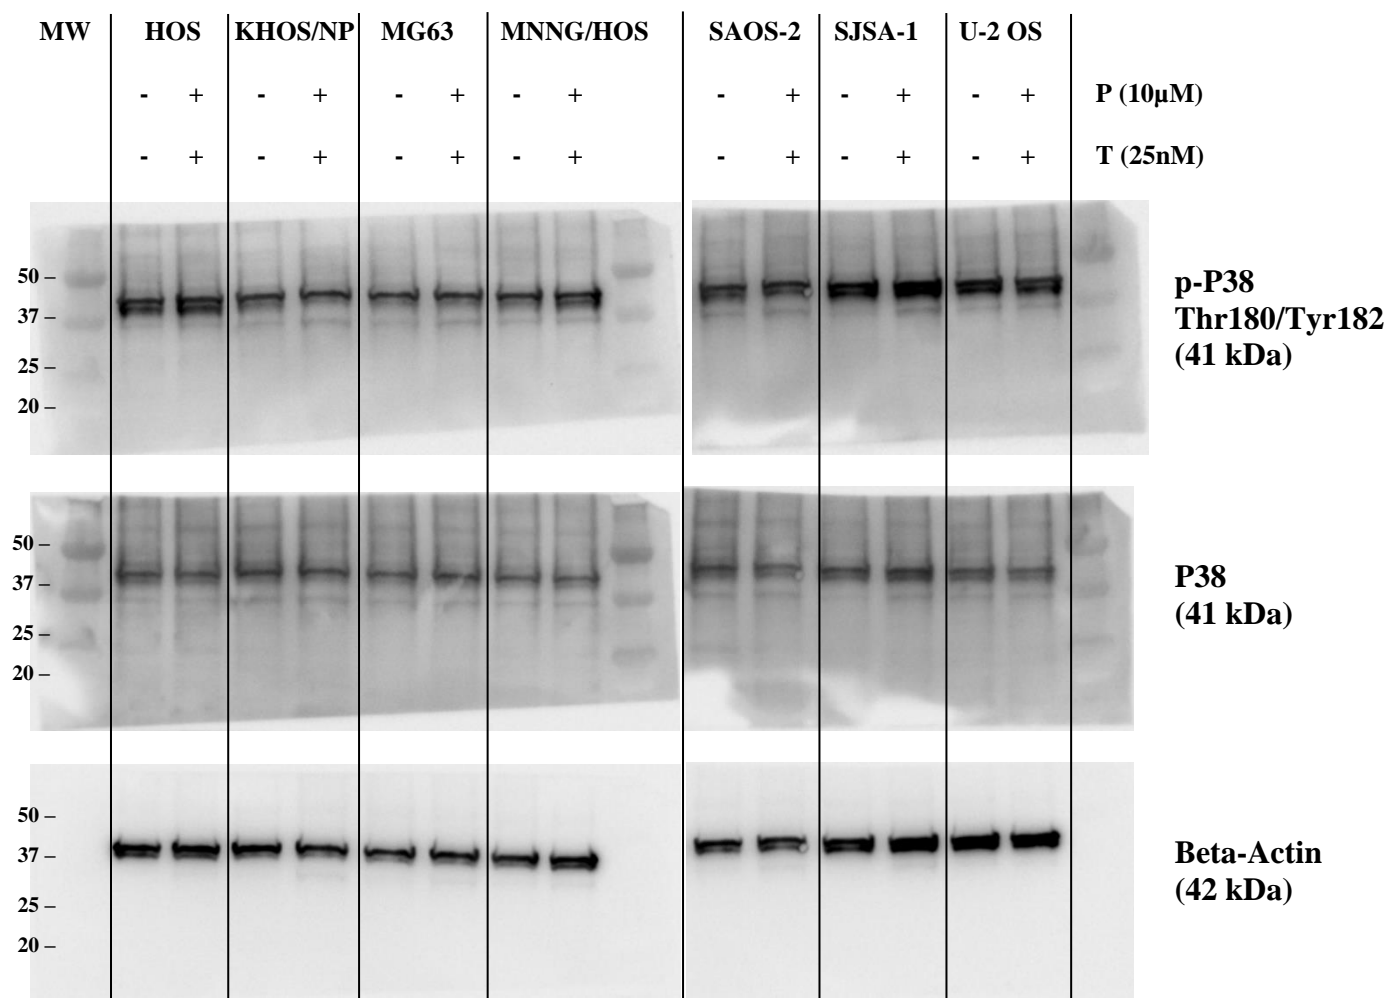

Supplement: s1 [file s1]
